# Supplementary material for: Enhanced superconductivity accompanying a Lifshitz transition in electron-doped FeSe monolayer
Source: PubMed Central journal article supplement (PMC5399296; doi:10.1038/ncomms14988), 2017-04-19
Supplement: ncomms14988-s1.pdf [file ncomms14988-s1.pdf]

1 **Supplementary figures**

2

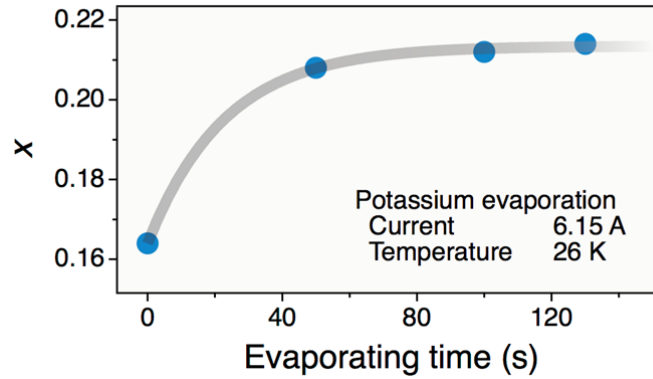

3

4 **Supplementary Figure 1 | Evolution of the electron doping level upon K evaporation.**

5 The grey line is a guide for the eye to show how the system evolves towards saturation upon  
6 consecutive K evaporation. Previous STM studies reported that the K atoms stay on the  
7 surface of the film [1, 2, 3]. Parts (could be all with very low coverage) of them are ionized,  
8 as supported by the observation of the K atom clusters with increasing coverage (>0.2ML) in  
9 the STM images. Unfortunately, we are not equipped with a low-temperature STM with  
10 atomic resolution. However, our ARPES (a sophisticated version of photoemission compared  
11 to XPS) data clearly show a chemical potential shift, thus indicating electron-doping in our  
12 experiment. The extra electrons can only come from the ionization of K.

13

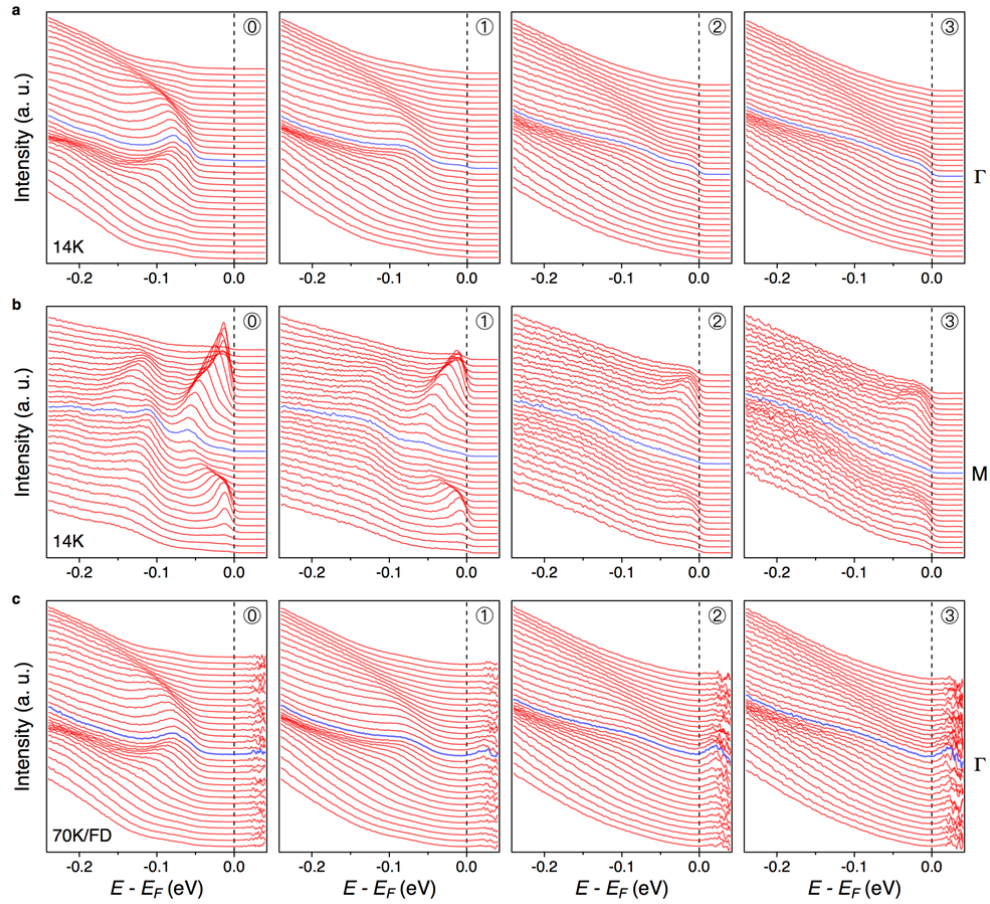

14  
15

16 **Supplementary Figure 2 | Evolution of the energy distribution curves (EDCs) upon K**  
 17 **deposition. a-b**, Potassium coating evolution of the EDC plots at 14 K near  $\Gamma$  and M along  
 18 the direction shown in the inset of Fig. 1 e. **c**, EDC plots along the same cut as in **a**, but  
 19 recorded at 70 K. The EDCs are divided by the Fermi-Dirac distribution convoluted  
 20 by the resolution function to visualize the states above  $E_F$ .

21

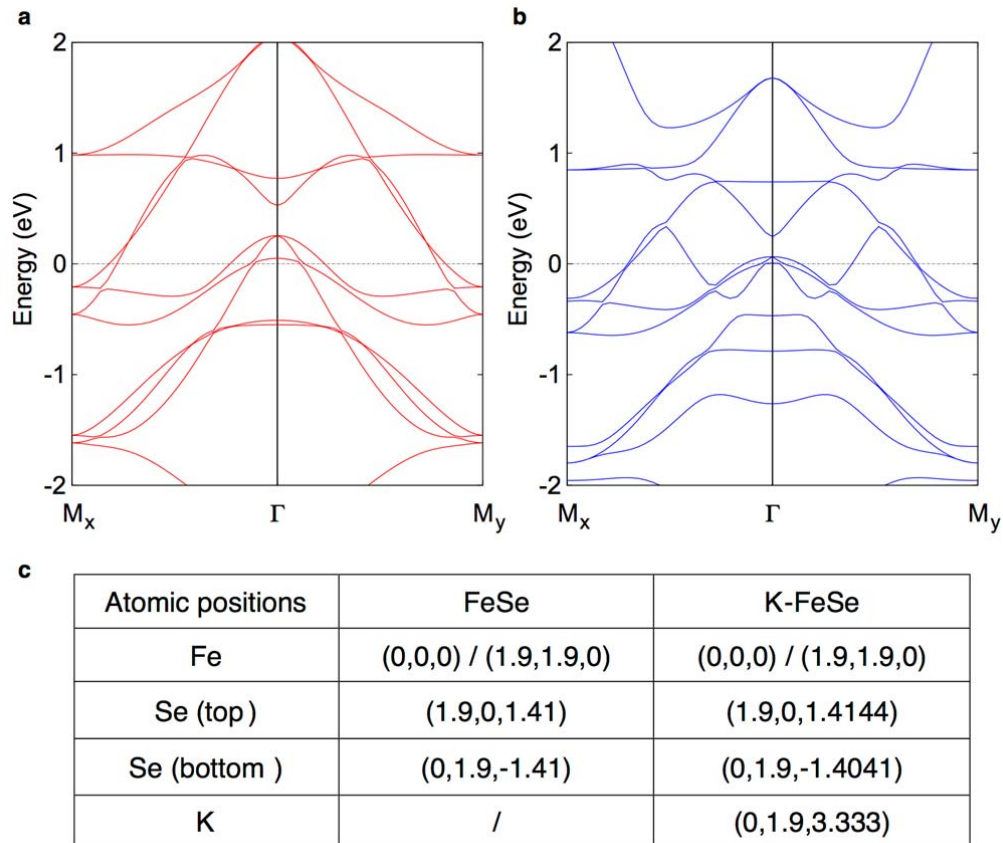

22

23 **Supplementary Figure 3 | LDA band structures.** **a**, Calculated electronic band structure of  
 24 pristine monolayer FeSe. **b**, Calculated electronic band structure of FeSe topped by one layer  
 25 of K, with one K atom per unit cell of FeSe. The gap between the  $d_{xy}/p_z$  band and the  $d_{xz}/d_{yz}$   
 26 band at  $\Gamma$  decreases from 270 to 180 meV with K deposition, and there is no band related to  
 27 K nearby. In both cases, the lattice constant is 3.8 Å and the internal atomic positions are  
 28 fully relaxed. **c**, Atomic positions of the pristine and K topped monolayer FeSe. In the former,  
 29 the bond length of Fe-Se is 2.366. In the latter, the bond lengths of Fe-Se(top) and Fe-  
 30 Se(bottom) are 2.36866 and 2.36250, respectively.

31

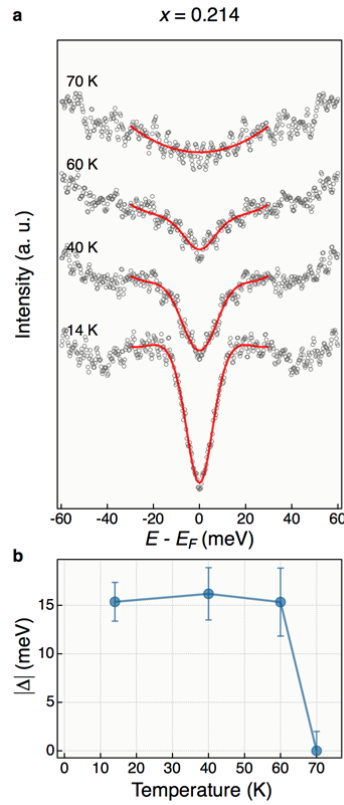

32

33 **Supplementary Figure 4 | Superconducting gap of potassium-coated 1UC FeSe/STO**  
 34 **with the doping level of  $x = 0.214$ .** **a**, Temperature evolution of the symmetrized EDCs at  
 35 the  $k_F$  point of the electron FS around M. The red curves correspond to fit of the data. **b**,  
 36 Superconducting gap sizes as a function of temperature obtained from the fits shown in **a**.  
 37 Error bars are estimated from the standard deviation of the fitting.

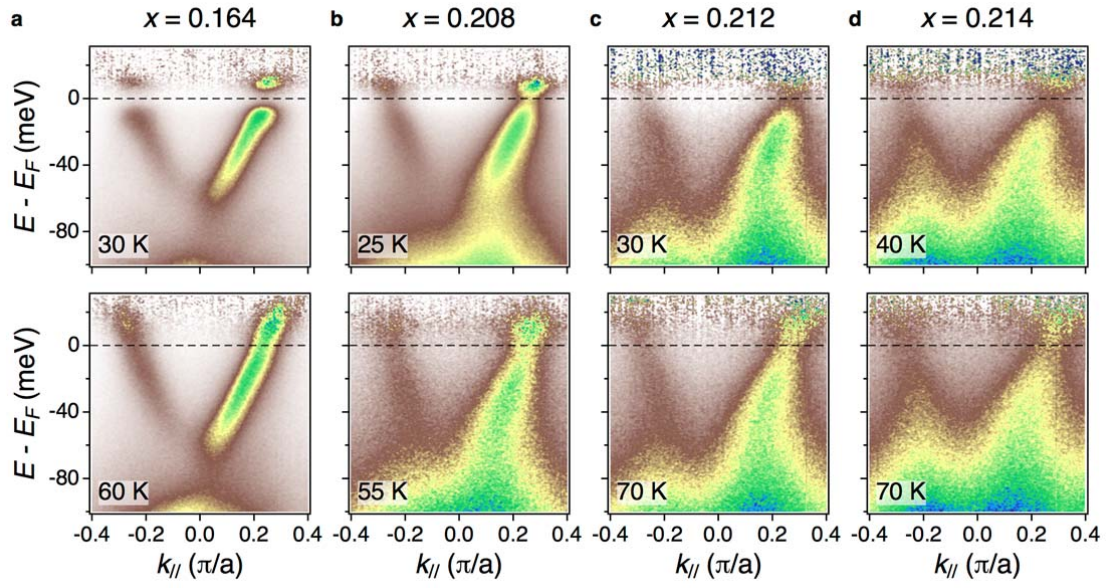

38

39

40 **Supplementary Figure 5 | Comparison of the spectra at different temperatures for each**  
 41 **sample. a**, ARPES intensity plots near the M point recorded at the low and high temperature  
 42 for the pristine 1UC FeSe/STO. The spectra are divided by the Fermi-Dirac function in order  
 43 to access partly the unoccupied states. **b-d**, Same as **a** but for the potassium-coated film with  
 44 the electron-doping level indicated above the panels, respectively.

45

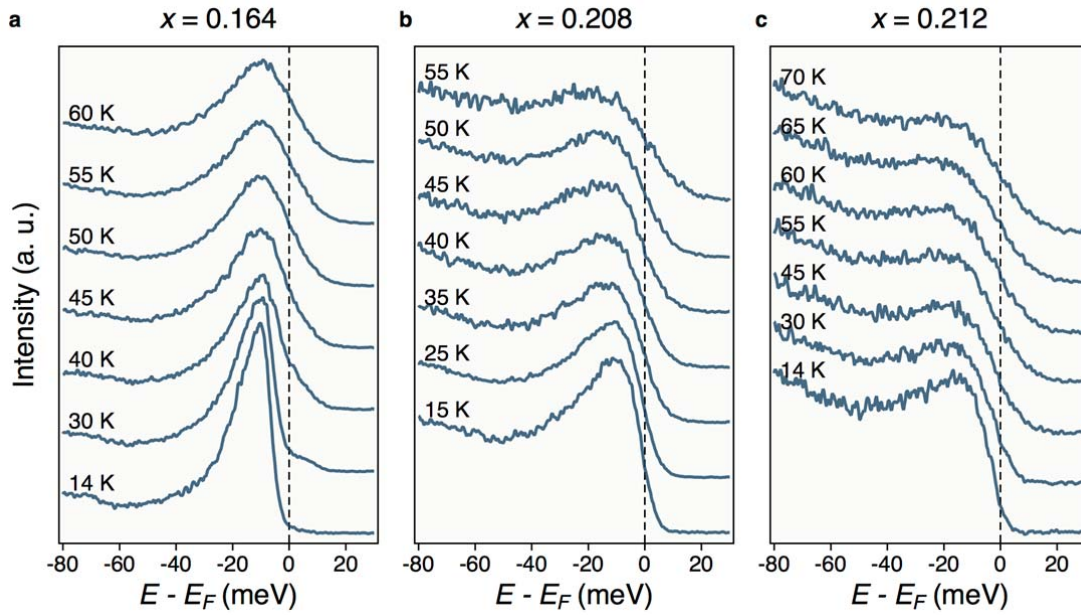

46

47

48 **Supplementary Figure 6 | Temperature evolution of the EDCs.** a-c, Temperature  
 49 evolution of the EDCs at the  $k_F$  point of the electron FS around M for pristine and potassium-  
 50 coated 1UC FeSe/STO. The electron doping is indicated above the panels.

51

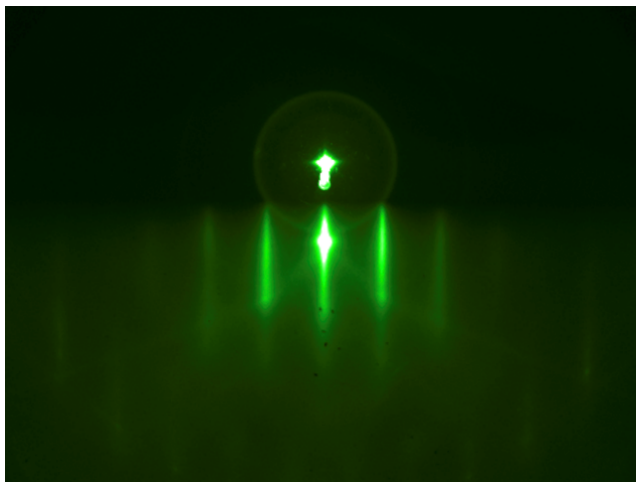

52

53 **Supplementary Figure 7 | Reflection high-energy electron diffraction (RHEED) image.**

54 RHEED image of the pristine monolayer film of FeSe/STO after annealing at 350 °C for 20h.

55

56 **Supplementary References**

- 57 1. Song, C.-L. *et al.* Observation of Double-Dome Superconductivity in Potassium-  
58 Doped FeSe Thin Films. *Phys. Rev. Lett.* **116**, 157001 (2016).
- 59 2. Tang, C. *et al.* Interface-enhanced electron-phonon coupling and high-temperature  
60 superconductivity in potassium-coated ultrathin FeSe films on SrTiO<sub>3</sub>. *Phys. Rev. B*  
61 **93**, 020507(R) (2016).
- 62 3. Zhang, W. H. *et al.* Effects of Surface Electron Doping and Substrate on the  
63 Superconductivity of Epitaxial FeSe Films. *Nano Lett.* **16**, 1969 (2016).

64
